# Supplementary material for: Warmte- en koudeopslag: het juridisch kader
Source: Royal Society of Chemistry journal article supplement (doi:10.1039/d3ay01702h), 2012-01-01
Supplement: d3ay01702h1.pdf [file d3ay01702h1.pdf]

## Electronic Supplementary Information

### Tuning fork-shaped bisbenzothiazole derivative as a pH-responsive digital fluorescent probe and its ex-vivo evaluation

Priya Ranjan Sahoo,<sup>a</sup> Nikhil Kumar,<sup>b</sup> Keloth Sairam,<sup>a</sup> L. K. Gulati,<sup>a</sup> G. K. Gulati,<sup>a</sup> Anupama Datta,<sup>b</sup> Satish Kumar\*

<sup>a</sup>*Department of Chemistry, St. Stephen's College, University Enclave, Delhi-110007, India.*

*E-mail: [satish@ststephens.edu](mailto:satish@ststephens.edu)*

<sup>b</sup>*Institute of Nuclear Medicine and Allied Sciences, DRDO, Brig. SK Majumdar Marg, Delhi 110054, India.  
E-mail [udatta@gmail.com](mailto:udatta@gmail.com)*

|                                  |       |
|----------------------------------|-------|
| 1. Experimental procedure        | S2    |
| 2. <sup>1</sup> H-NMR spectrum   | S4-S5 |
| 3. <sup>13</sup> C-NMR spectrum  | S6-S7 |
| 4. FT-IR spectrum                | S8    |
| 5. HR-MS spectrum                | S9    |
| 6. Haemolysis Analysis           | S10   |
| 7. Additional X-ray data         | S11   |
| 8. 2D-Fingerprint plots          | S14   |
| 9. CLP-Pixel data                | S14   |
| 10. Additional Fluorescence data | S14   |
| 11. Additional colorimetric data | S15   |

## General Information and Remarks:

The Nuclear Magnetic resonance ( $^1\text{H}$  NMR and  $^{13}\text{C}$  NMR) spectra were recorded on a 400 MHz *Jeol NMR* ECX 400 NMR spectrometer. UV-visible spectra were recorded on an Ocean Optics USB 4000 UV-visible spectrometer. Fluorescence measurements were performed using a Cary Eclipse Fluorescence spectrophotometer. Time-resolved fluorescence measurements were recorded on Horiba Vyon with an automated polarizer. The powder X-ray Diffraction pattern was recorded on a pan-analytical X-ray diffractometer. The Melting Point was determined using the ALTIS melting point apparatus and was uncorrected. Di-formyl tertbutyl phenol was prepared according to the reported literature. 2-Amino thiophenol was directly purchased from Spectrochem India Pvt. Ltd.

## Procedures:

### X-ray structure determination:

The detailed crystal data, collection, and structure refinement parameters for **1** are listed in Table S1.<sup>1</sup> Olex2<sup>2</sup> GUI was employed to get a solution of the structure with the help of ShelXT/direct method,<sup>3</sup> and refinement was accomplished using ShelXL/least square<sup>4</sup> program. All the non-hydrogen atoms in all the structures were refined anisotropically. The aromatic H atoms in all structures were placed at the calculated positions (C-H = 0.93 Å) and refined with the help of the riding model with  $U_{\text{iso}}(\text{H}) = 1.2U_{\text{eq}}(\text{C})$ . Mercury software<sup>5</sup> The  $\text{CH}_3$  group protons (C-H = 0.96 Å) were placed at the position and refined using a riding model such that  $U_{\text{iso}}(\text{H}) = 1.5U_{\text{eq}}(\text{C})$ , The methyl group was refined as an idealized rotor. was used to prepare the graphics material for publication.

### Procedure for UV-visible studies at different pH

The pH ( $2.0 \times 10^{-5}$  M) range between 1 to 12 was set by using an ELICO pH meter; 1 to 12. The UV-visible data of probe **1** at different pHs were recorded on an Ocean Optics UV-visible spectrometer.

### Procedure for fluorescence studies at different pH

The different pH of probe **1** ( $2.0 \times 10^{-5}$  M) was set in an ELICO pH meter from pH = 1 to 12. The solutions were inserted in a quartz cuvette and the fluorescence spectrum was recorded on a VARIAN CARY Eclipse Fluorescence spectrometer. The slit width was set at 5.0 nm.

### Synthesis of the probe **1**

In a 100 mL round bottom flask, diformyl *tert*-butyl phenol (1 g, 4.84 mmol) was mixed with 2-amino thiophenol (1.0 mL, 9.6 mmol) and was stirred in 30 mL of ethanol for 24 h. The resulting reaction mixture was filtered and the solid product was purified by flash column chromatography (10% EA/hexane) to give a yellow solid. Yield: 82% m.pt.230-234°C <sup>1</sup>H-NMR (400MHz, CDCl<sub>3</sub>): 13.96 (s, 1H), 8.26 (s, 2H), 8.07(d, 3H, *J* = 8.4Hz), 7.94(d, 3H, *J* = 8.4Hz), 7.51(t, 3H, *J* = 7.6Hz), 7.40(t, 3H, *J* = 7.6Hz), 1.45(s, 9H). <sup>13</sup>C-NMR (100 MHz, CDCl<sub>3</sub>): 154.08, 151.78, 128.6, 126.4, 125.22, 122.5, 121.45, 34.47, 31.45. FT-IR (v/cm-1): 3743.98, 3678.36, 2959.27, 1611.11, 1492.88, 1366.24, 1308.16, 1240.42, 1104.05, 1062.99, 1017.20, 927.31, 884.64, 757.97, 653.79. HRMS *m/z* Calculated for C<sub>24</sub>H<sub>20</sub>N<sub>2</sub>OS<sub>2</sub>: 416.1017, found: [C<sub>24</sub>H<sub>20</sub>N<sub>2</sub>OS<sub>2</sub>+H<sup>+</sup>]: 417.1061.

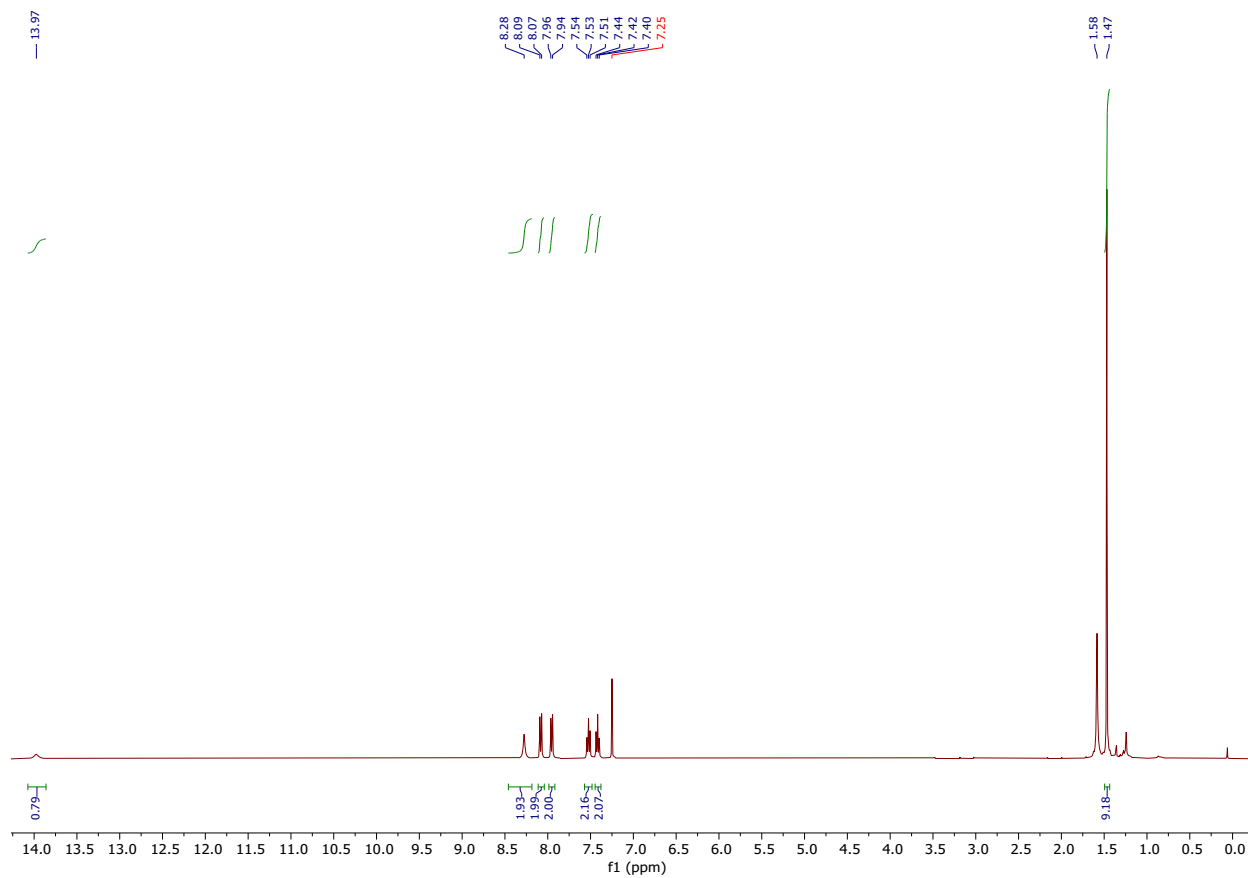

**Fig. S1.** <sup>1</sup>H-NMR spectrum of the probe **1**.

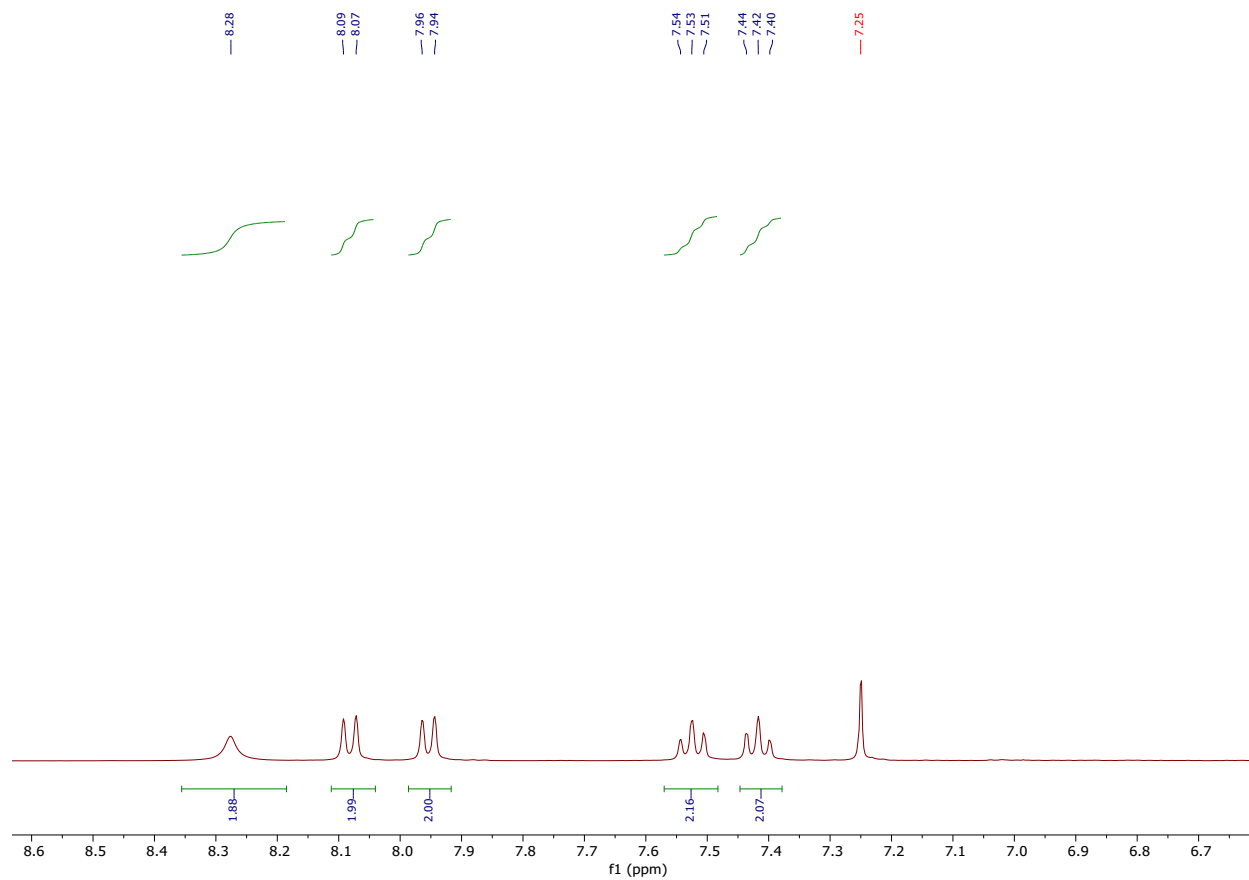

**Fig. S1a.** Partial  $^1\text{H-NMR}$  spectrum of the probe **1**.

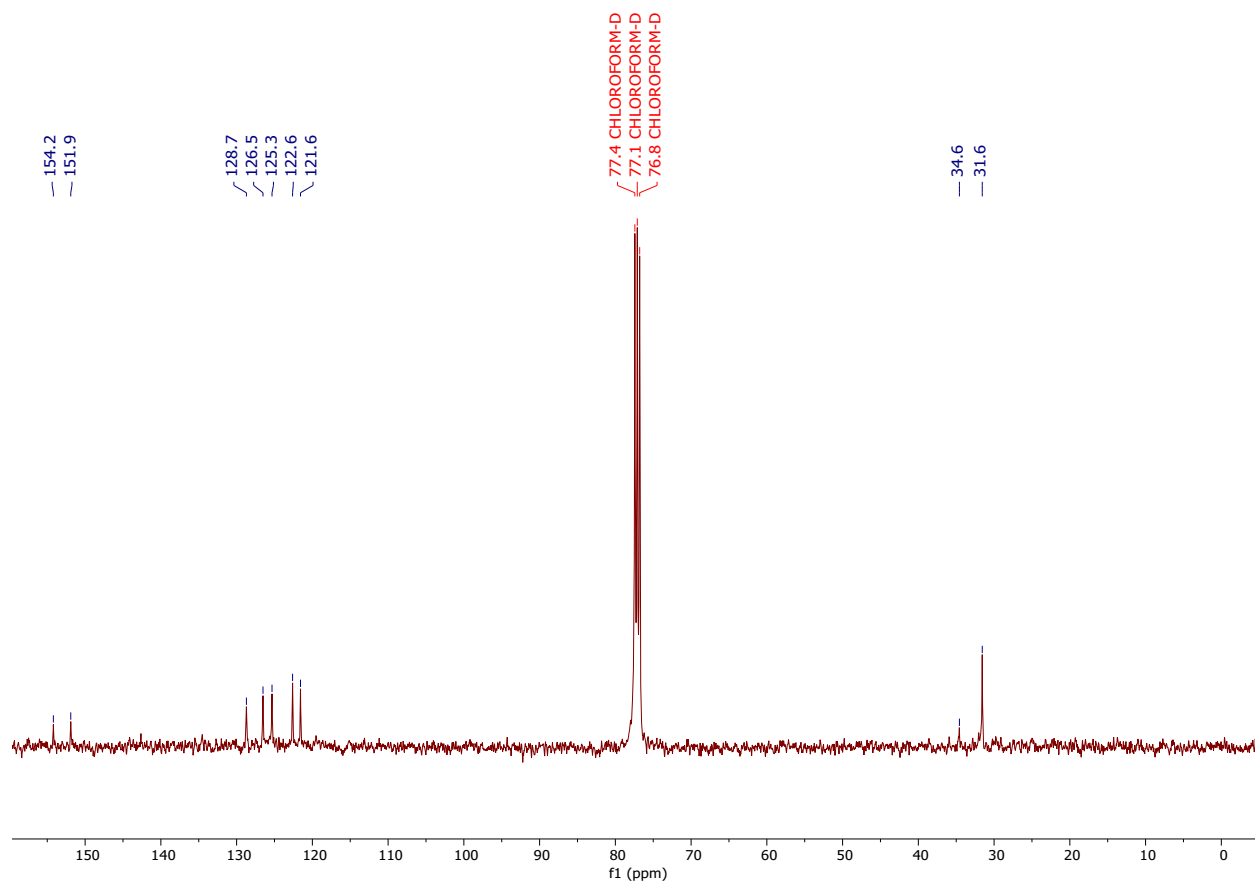

**Fig. S2.**  $^{13}\text{C}$ -NMR spectrum of the probe 1.

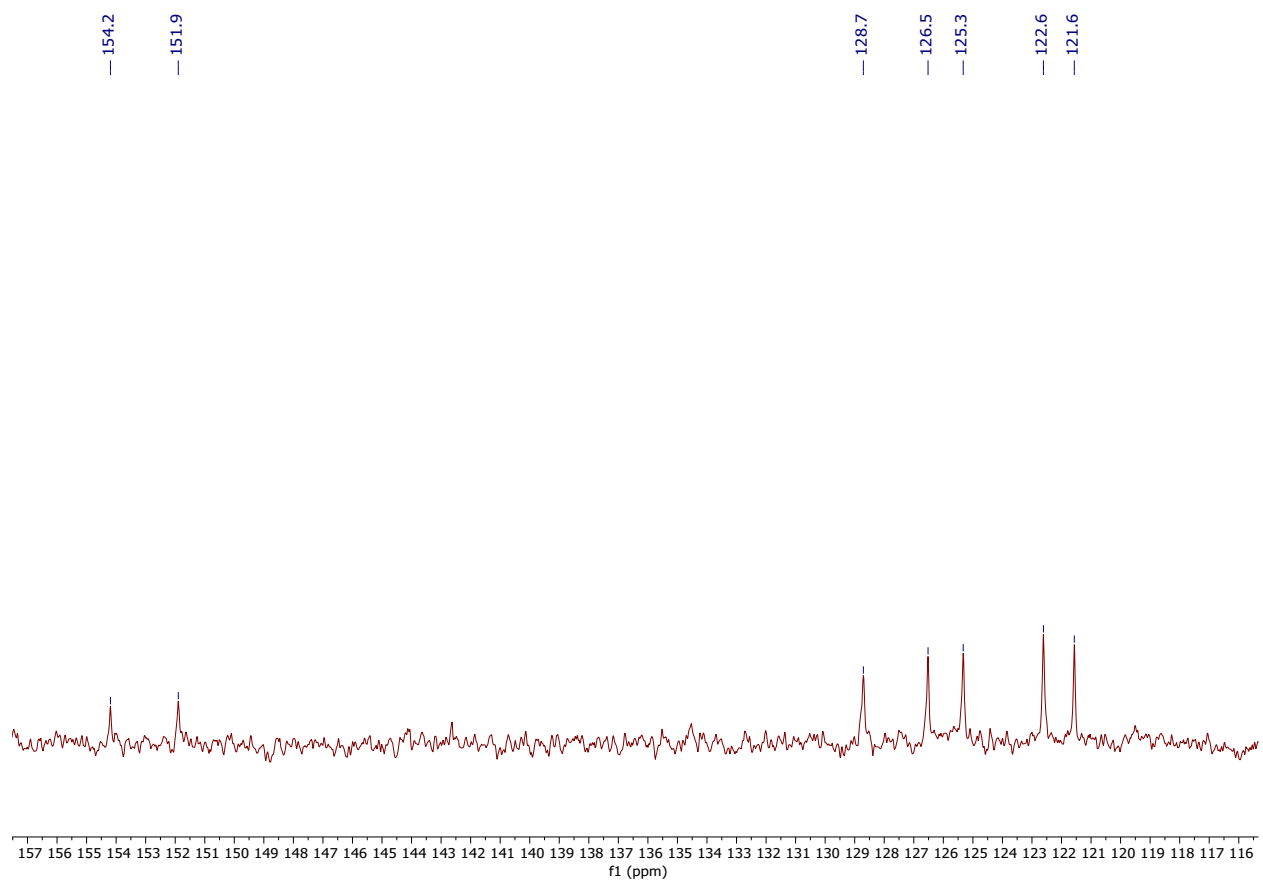

**Fig. S2a.** Partial  $^{13}\text{C}$ -NMR spectrum of the probe 1.

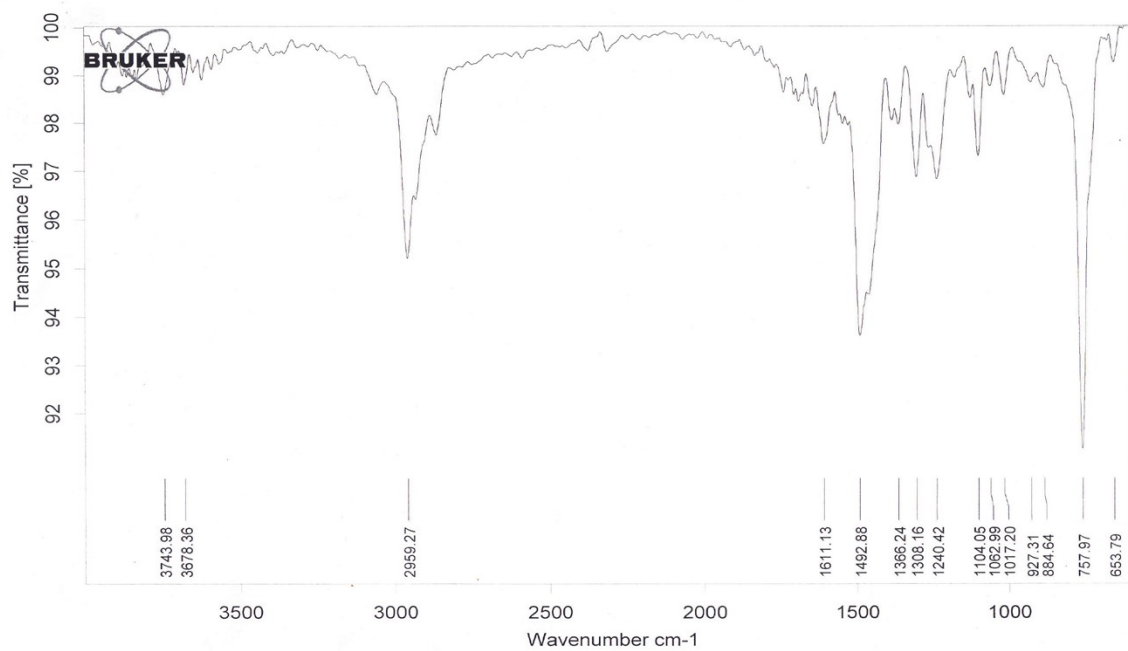

**Fig. S3.** Fourier Transform Infrared (FT-IR) spectrum of the probe **1**.



## Qualitative Compound Report

|                        |              |               |                     |
|------------------------|--------------|---------------|---------------------|
| Data File              | SPS-131.d    | Sample Name   | SPS-131             |
| Sample Type            | Sample       | Position      | P1-A7               |
| Instrument Name        | Instrument 1 | User Name     |                     |
| Acq Method             | 29.10.2014.m | Acquired Time | 10-10-2016 13:41:16 |
| IRM Calibration Status | Success      | DA Method     | Default.m           |
| Comment                |              |               |                     |

Sample Group Info.  
 Acquisition SW 6200 series TOF/6500 series  
 Version Q-TOF B.05.01 (B5125)

### Compound Table

| Compound Label         | RT | Mass     | Formula         | MFG Formula     | MFG Diff (ppm) | DB Formula      |
|------------------------|----|----------|-----------------|-----------------|----------------|-----------------|
| Cpd 4: C24 H20 N2 O S2 | 13 | 416.0988 | C24 H20 N2 O S2 | C24 H20 N2 O S2 | 7.03           | C24 H20 N2 O S2 |

| Compound Label         | m/z      | RT | Algorithm                 | Mass     |
|------------------------|----------|----|---------------------------|----------|
| Cpd 4: C24 H20 N2 O S2 | 417.1061 | 13 | Find by Molecular Feature | 416.0988 |

### MFE MS Spectrum

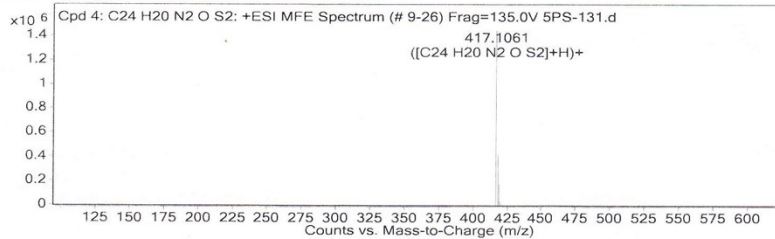

### MFE MS Zoomed Spectrum

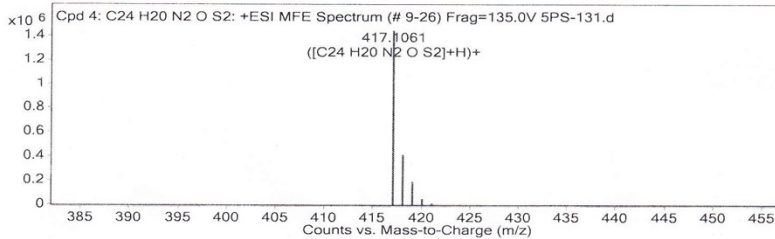

### MS Spectrum Peak List

| m/z      | z | Abund      | Formula         | Ion    |
|----------|---|------------|-----------------|--------|
| 417.1061 | 1 | 1442653.88 | C24 H20 N2 O S2 | (M+H)+ |
| 418.109  | 1 | 413013.28  | C24 H20 N2 O S2 | (M+H)+ |
| 419.105  | 1 | 177140.24  | C24 H20 N2 O S2 | (M+H)+ |
| 420.1058 | 1 | 38913.94   | C24 H20 N2 O S2 | (M+H)+ |
| 421.1052 | 1 | 7809.22    | C24 H20 N2 O S2 | (M+H)+ |
| 422.1047 | 1 | 1455.23    | C24 H20 N2 O S2 | (M+H)+ |

--- End Of Report ---

**Fig. S4.** High-Resolution Mass spectrum of the probe 1.

## Haemolysis Assay

A hemolysis assay was performed as per the procedure reported earlier in the literature using heparinized blood from healthy volunteers. Haemolysis experiment and serum stability assays were conducted using human serum by the procedure approved by Institutional Human Ethical Committee at INMAS, DRDO. Blood serum was obtained by centrifugation followed by repeated washing of the RBC pellet with PBS (pH = 7.4). The pellet was suspended again in PBS and added to different vials in equal amounts. Similarly, variable concentrations of the probe were taken in equal volumes and incubated with the RBC pellet in an 8:2 ratio at 37 °C. The Triton X-100 (2% v/v) and phosphate buffer saline were used as positive and negative controls, respectively, which were also incubated with RBCs at similar experimental conditions. The solvent (100 µL) was centrifuged and withdrawn at the following intervals: 1 h, 2 h, 4h, and 24 h. The supernatant solution was used to measure absorbance at 540 nm in a 96-well plate by a Synergy 2 Multi-Mode Reader (BioTek Instruments, United States). The experiments were performed three times and the degree of hemolysis was calculated using the following formula (reference: <https://doi.org/10.1021/acsami.6b15203>):

$$\text{Hemolysis ratio} = \frac{(\lambda(\text{test}) - \lambda(\text{negative control}))}{(\lambda(\text{positive control}) - \lambda(\text{negative control}))} \times 100\%$$

where  $\lambda(\text{test})$  represents the absorbance values of the test sample;  $\lambda(\text{negative control})$  is a measure of absorbance values of phosphate buffer saline and  $\lambda(\text{positive control})$  represents the absorbance values for Triton X-100.

**Table S1:** Crystallographic Parameters of the probe **1** (CCDC 1509581).

|                                                                            |                                                                                                                                                                                                                                                                           |
|----------------------------------------------------------------------------|---------------------------------------------------------------------------------------------------------------------------------------------------------------------------------------------------------------------------------------------------------------------------|
| Crystal data                                                               |                                                                                                                                                                                                                                                                           |
| Chemical formula                                                           | $C_{23.96}H_{19.89}N_2OS_2$                                                                                                                                                                                                                                               |
| $M_r$                                                                      | 416.05                                                                                                                                                                                                                                                                    |
| Crystal system, space group                                                | Monoclinic, $P2_1/n$                                                                                                                                                                                                                                                      |
| Temperature (K)                                                            | 297                                                                                                                                                                                                                                                                       |
| $a, b, c$ (Å)                                                              | 13.6239 (16), 7.8788 (11), 19.179 (3)                                                                                                                                                                                                                                     |
| $\beta$ (°)                                                                | 92.723 (11)                                                                                                                                                                                                                                                               |
| $V$ (Å <sup>3</sup> )                                                      | 2056.4 (5)                                                                                                                                                                                                                                                                |
| $Z$                                                                        | 4                                                                                                                                                                                                                                                                         |
| Radiation type                                                             | Mo $K\alpha$                                                                                                                                                                                                                                                              |
| $\mu$ (mm <sup>-1</sup> )                                                  | 0.28                                                                                                                                                                                                                                                                      |
| Crystal size (mm)                                                          | 0.02 × 0.01 × 0.01                                                                                                                                                                                                                                                        |
| Data collection                                                            |                                                                                                                                                                                                                                                                           |
| Diffractometer                                                             | Xcalibur, Sapphire3                                                                                                                                                                                                                                                       |
| Absorption correction                                                      | Multi-scan<br><i>CrysAlis PRO</i> , Agilent Technologies, Version 1.171.36.32 (release 02-08-2013 <i>CrysAlis171.NET</i> ) (compiled Aug 2 2013, 16:46:58)<br>Empirical absorption correction using spherical harmonics, implemented in SCALE3 ABSPACK scaling algorithm. |
| $T_{\min}, T_{\max}$                                                       | 0.872, 1.000                                                                                                                                                                                                                                                              |
| No. of measured, independent and observed [ $I > 2\sigma(I)$ ] reflections | 28368, 3784, 1057                                                                                                                                                                                                                                                         |
| $R_{\text{int}}$                                                           | 0.307                                                                                                                                                                                                                                                                     |
| $(\sin \theta/\lambda)_{\text{max}}$ (Å <sup>-1</sup> )                    | 0.606                                                                                                                                                                                                                                                                     |
| Refinement                                                                 |                                                                                                                                                                                                                                                                           |
| $R[F^2 > 2\sigma(F^2)], wR(F^2), S$                                        | 0.087, 0.215, 0.87                                                                                                                                                                                                                                                        |
| No. of reflections                                                         | 3784                                                                                                                                                                                                                                                                      |
| No. of parameters                                                          | 266                                                                                                                                                                                                                                                                       |
| No. of restraints                                                          | 12                                                                                                                                                                                                                                                                        |
| H-atom treatment                                                           | H atoms treated by a mixture of independent and constrained refinement                                                                                                                                                                                                    |

$\Delta\rho_{\max}, \Delta\rho_{\min}$  ( $e \text{ \AA}^{-3}$ )0.31,  $-0.35$ 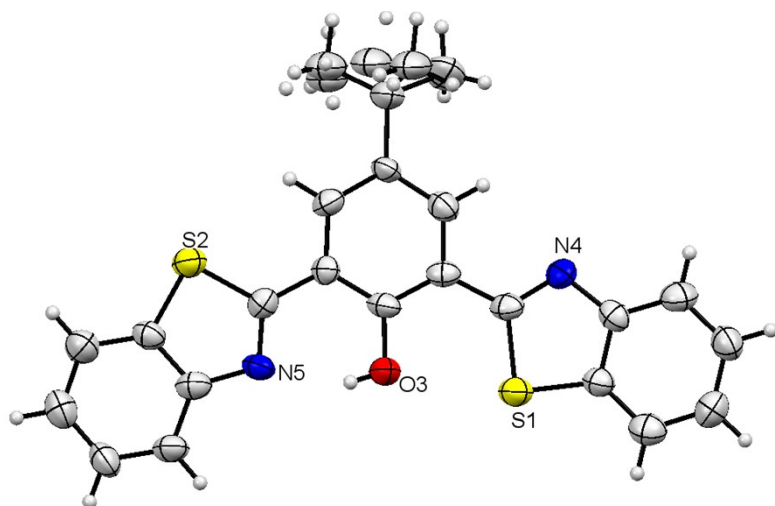

**Fig. S5.** ORTEP representation of the probe **1**. Ellipsoids are shown at 50% Probability level.

**Table S2.** Hydrogen-Bond geometry ( $\text{\AA}$ ,  $^\circ$ ) for **1**.

| D               | H               | A                           | d(D-H)/ $\text{\AA}$ | d(H-A)/ $\text{\AA}$ | d(D-A)/ $\text{\AA}$ | D-H-A/ $^\circ$ |
|-----------------|-----------------|-----------------------------|----------------------|----------------------|----------------------|-----------------|
| O <sub>3</sub>  | H <sub>3</sub>  | N <sub>5</sub>              | 0.76(5)              | 1.90(5)              | 2.598(5)             | 153.6           |
| C <sub>10</sub> | H <sub>10</sub> | S <sub>2</sub>              | 0.93                 | 2.69                 | 3.118(5)             | 108.8           |
| C <sub>13</sub> | H <sub>13</sub> | N <sub>4</sub>              | 0.93                 | 2.44                 | 2.789(6)             | 102.5           |
| C <sub>23</sub> | H <sub>23</sub> | O <sub>3</sub> <sup>1</sup> | 0.93                 | 2.95                 | 3.662(6)             | 134.3           |

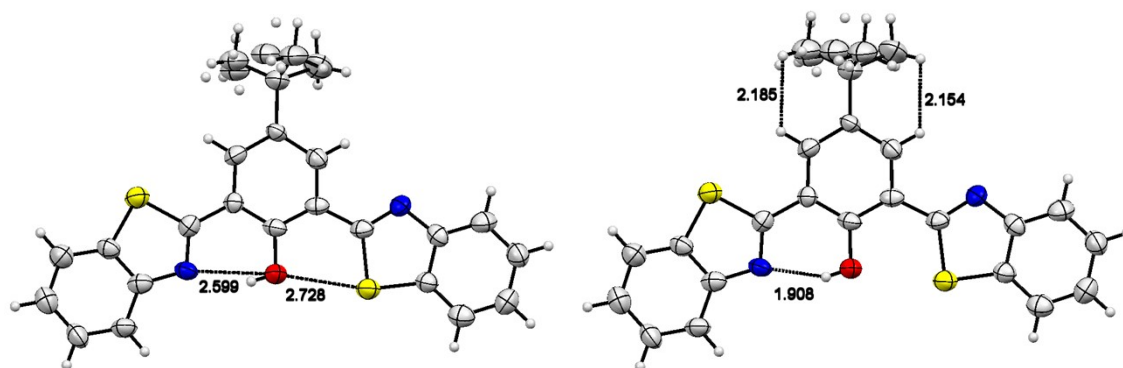

**Fig. S6.** Hydrogen Bonding and Short Intramolecular Contacts of the probe **1**. Ellipsoids are shown at 50% Probability level.

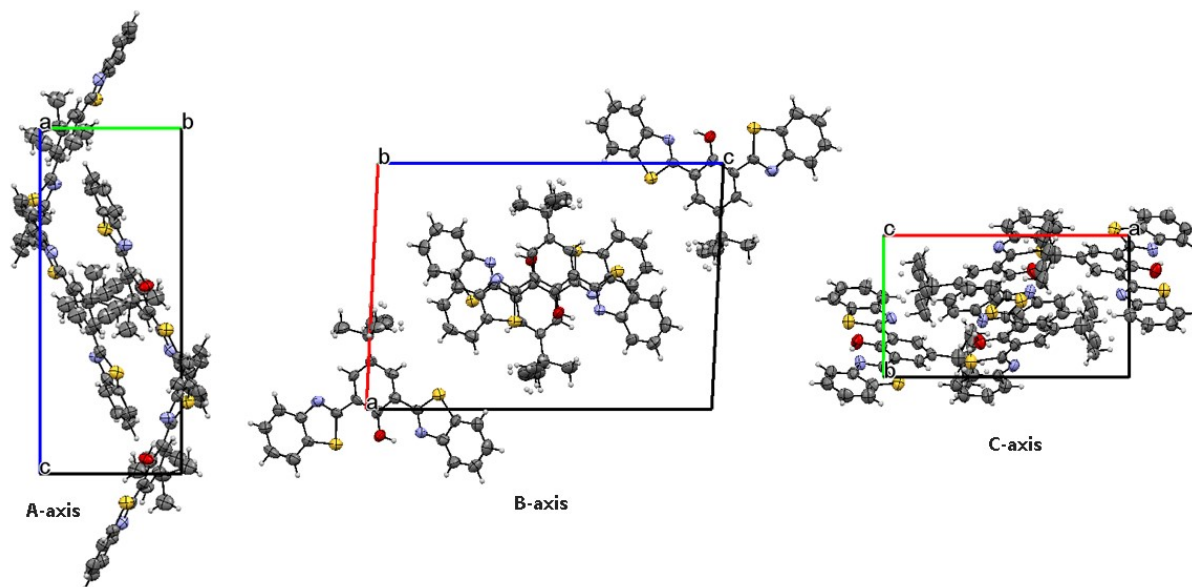

**Fig. S7.** Crystal packing diagram of probe **1** along the a-axis, b-axis, and c-axis respectively. Ellipsoids are shown at 50% Probability level.

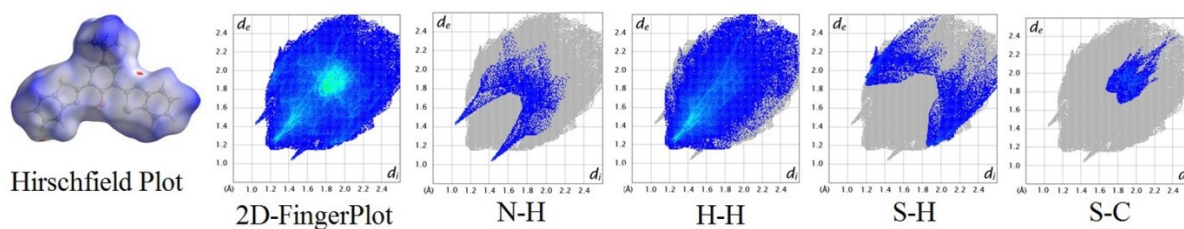

**Fig. S8.** The Hirschfeld surface, a 2D-fingerprint plot showing complete, N-H, H-H, S-H, and S-C interactions respectively using Crystal Explorer 3.0 software.

**Table S3.** The different lattice energy components were calculated using the CLP-PIXEL method.

|          | $E_{coul}$<br>(kJ/mol) | $E_{pol}$<br>(kJ/mol) | $E_{disp}$<br>(kJ/mol) | $E_{rep}$<br>(kJ/mol) | $E_{tot}$<br>(kJ/mol) |
|----------|------------------------|-----------------------|------------------------|-----------------------|-----------------------|
| <b>1</b> | 3.1                    | -43.0                 | -173.6                 | 28.1                  | -185.4                |

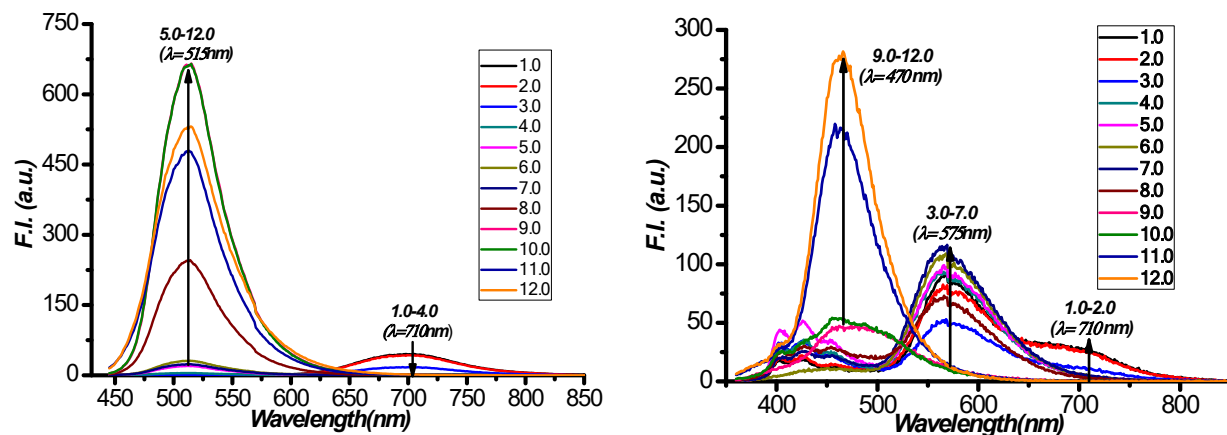

**Fig. S9.** Fluorescence Intensity response of probe 1 towards different pH at two different excitation wavelengths (a)  $\lambda_{\text{ex}} = 435\text{nm}$  and (b)  $\lambda_{\text{ex}} = 350\text{nm}$  in Methanol-TRIS.

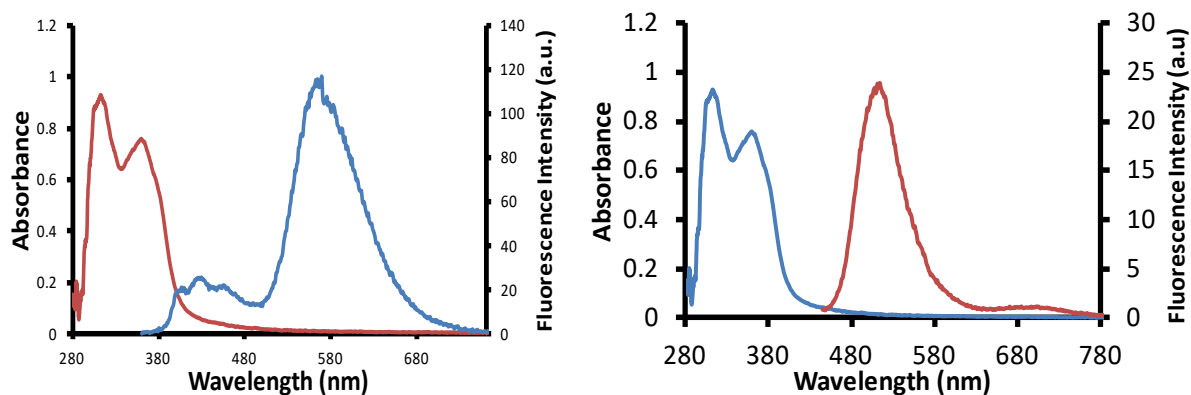

**Fig. S10.** Absorption and Fluorescence spectra of probe 1 ( $[1] = 2.0 \times 10^{-5} \text{ M}$ ) in MeOH: water, (a)  $\lambda_{\text{ex}} = 350 \text{ nm}$ , (b)  $\lambda_{\text{ex}} = 435 \text{ nm}$  system.

**Table. S4** Absorbance and Emission of the probe 1 at different pH.

| pH | Abs, $\lambda(\text{nm})$ | FI, $\lambda(\text{nm})$ | Lifetime(ns) |
|----|---------------------------|--------------------------|--------------|
| 1  | 0.69,349                  | 44.24,699                |              |
| 2  | 0.71,352                  | 42.61,697                | 2.92         |
| 3  | 0.73,357                  | 17.18,695                |              |
| 4  | 0.79,360                  | 4.89,510                 | 3.19         |
| 5  | 0.77,360                  | 23.16,510                |              |
| 6  | 0.74,362                  | 23, 511                  | 3.29         |
| 7  | 0.07,425                  | 31, 511                  |              |

|    |          |         |      |
|----|----------|---------|------|
| 8  | 0.15,428 | 244,512 |      |
| 9  | 0.53,432 | 475,512 |      |
| 10 | 0.56,435 | 531,513 | 3.29 |
| 11 | 0.75,437 | 660,513 |      |
| 12 | 0.85,439 | 662,513 |      |

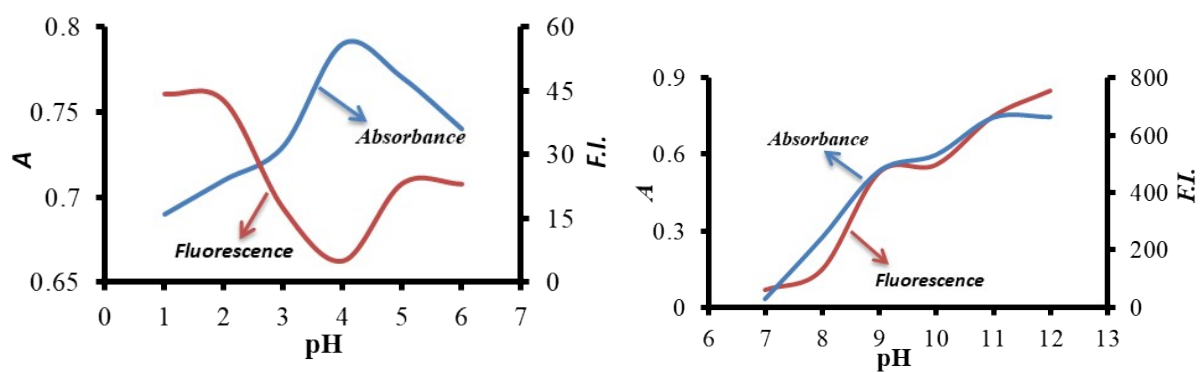

**Fig. S11.** Comparison of Absorbance and Fluorescence Emission of probe **1** at different pH.

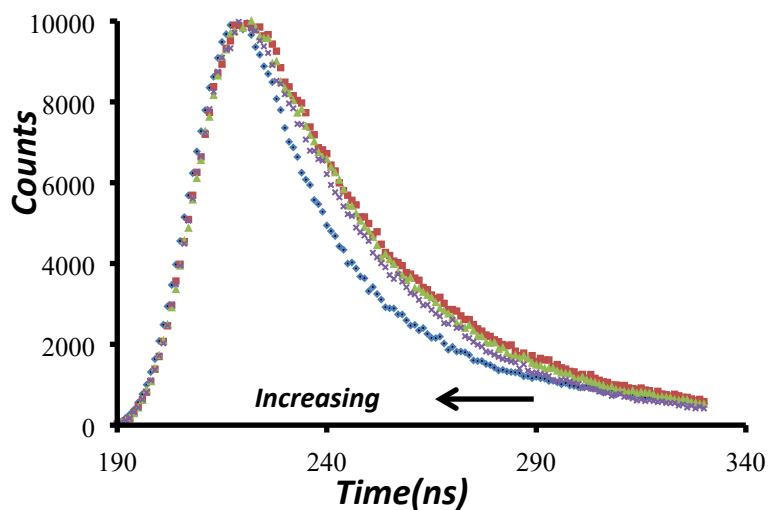

**Fig. S12.** Lifetimes decay profile of probe **1** at different pH at an excitation wavelength at  $\lambda_{\text{ex}} = 350\text{nm}$  in Methanol-Tris.

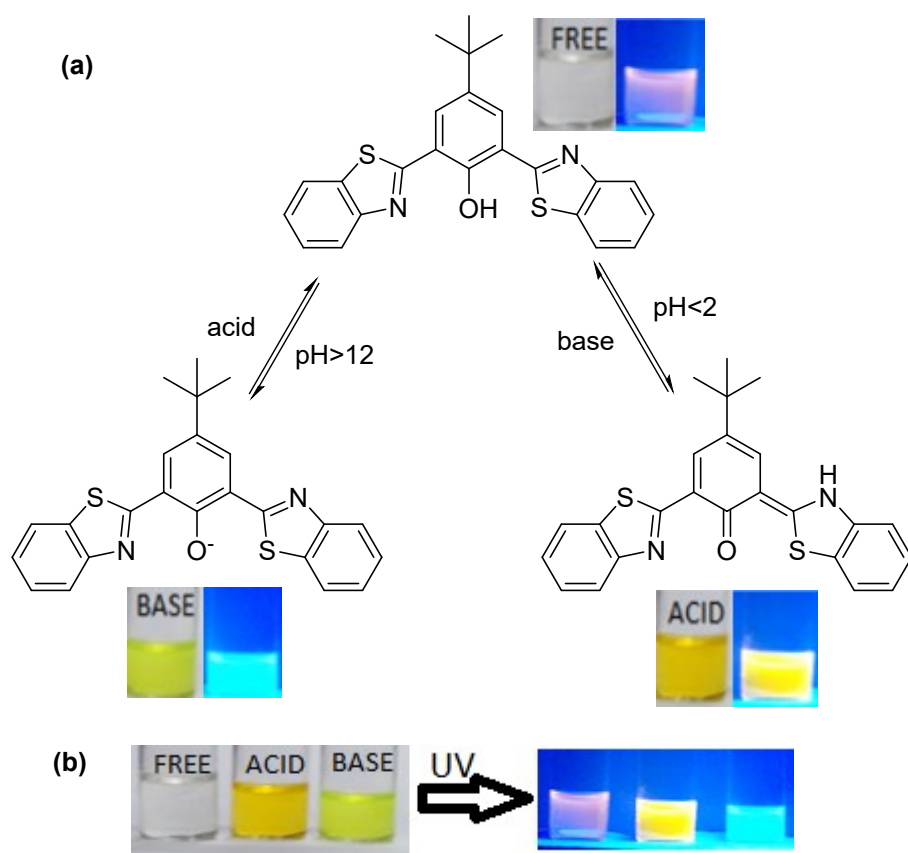

**Fig. S13. (a)** Plausible Mechanism of the probe **1** under acidic and basic environment. **(b)** Colorimetric and Fluorometric view of probe **1** under day and UV light (365nm) under acidic and basic conditions.



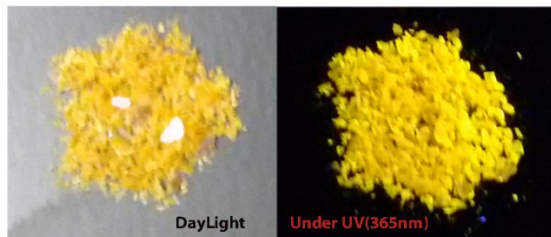

**Fig.S14.** Snapshots of the crude product under (DayLight) and under (UV-365nm) of the probe 1.

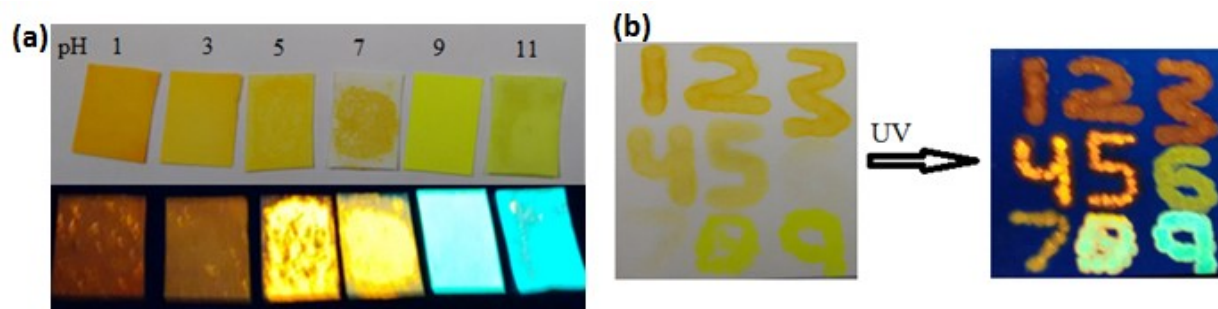

**Fig. S15.** (left) Fabrication of pH strips following impregnation of probe 4.2 (right) digital response of probe 4.2 with encoded numerical 1 to 9 in MeOH: water (1:1, pH = 1-12, 1.0 mM HEPES).

### References:

1. S. Parsons, H. D. Flack and T. Wagner, *Acta Cryst. B*, 2013, **69**, 249-259.
2. O. V. Dolomanov, L. J. Bourhis, R. J. Gildea, J. A. Howard and H. Puschmann, *J. Appl. Crystallogr.*, 2009, **42**, 339-341.
3. G. M. Sheldrick, *Acta Cryst. A*, 2015, **71**, 3-8.
4. G. M. Sheldrick, *Acta Cryst. C*, 2015, **71**, 3-8.
5. C. F. Macrae, I. J. Bruno, J. A. Chisholm, P. R. Edgington, P. McCabe, E. Pidcock, L. Rodriguez-Monge, R. Taylor, J. v. Streek and P. A. Wood, *J. Appl. Crystallogr.*, 2008, **41**, 466-470.
